# Supplementary material for: Selective Inhibition of Heparan Sulphate and Not Chondroitin Sulphate by a Small, Soluble Competitive Inhibitor
Source: Preprints.org preprint supplement (doi:10.20944/preprints202105.0600.v1), 2021-05-25
Supplement: Supplementary file 1 [file supplementary]

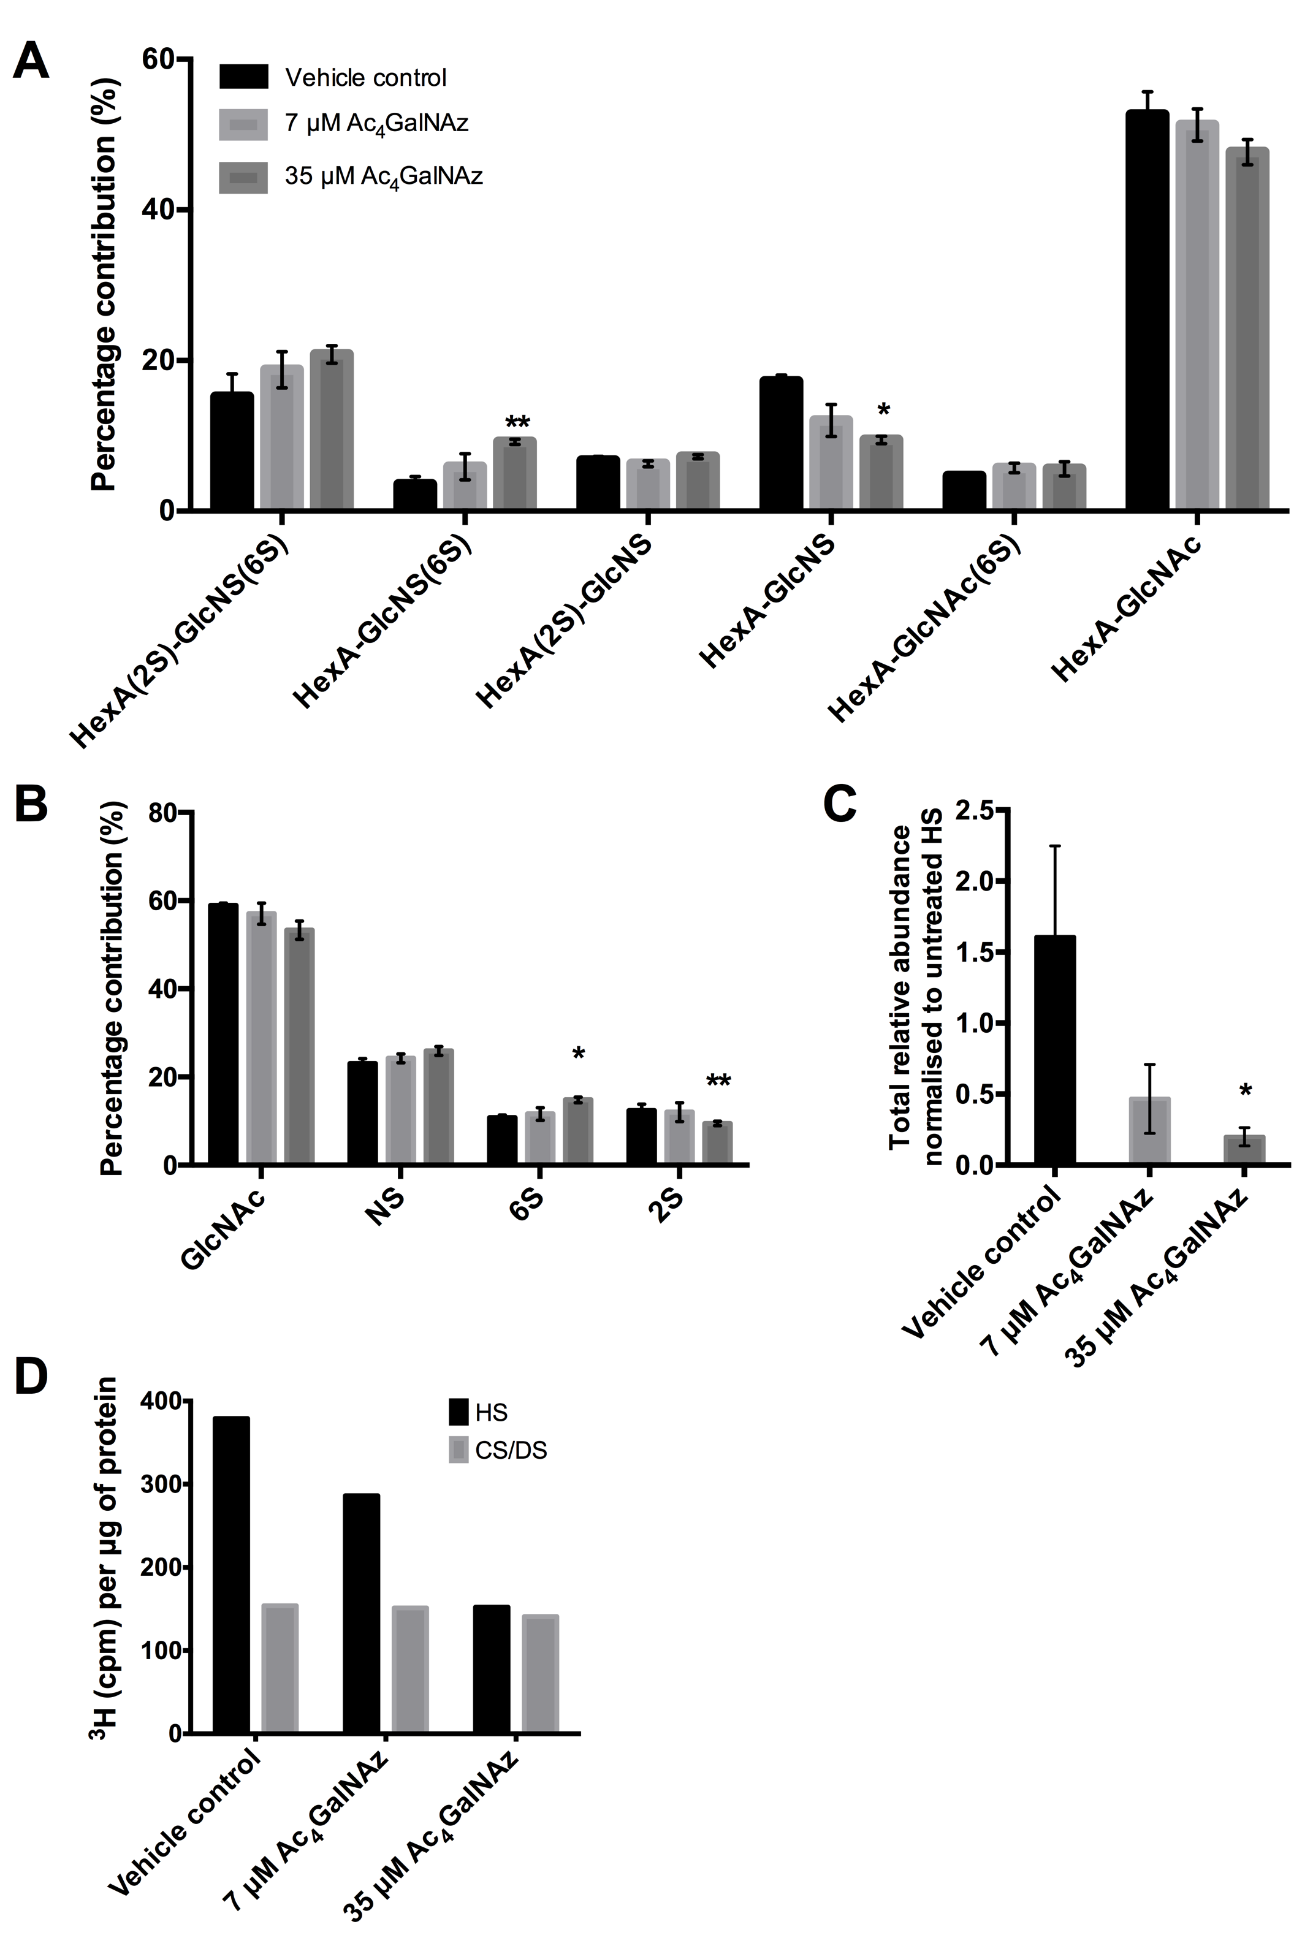


**Supplementary Figure 1. Total GAG synthesis normalized to protein levels from CHO cells.**


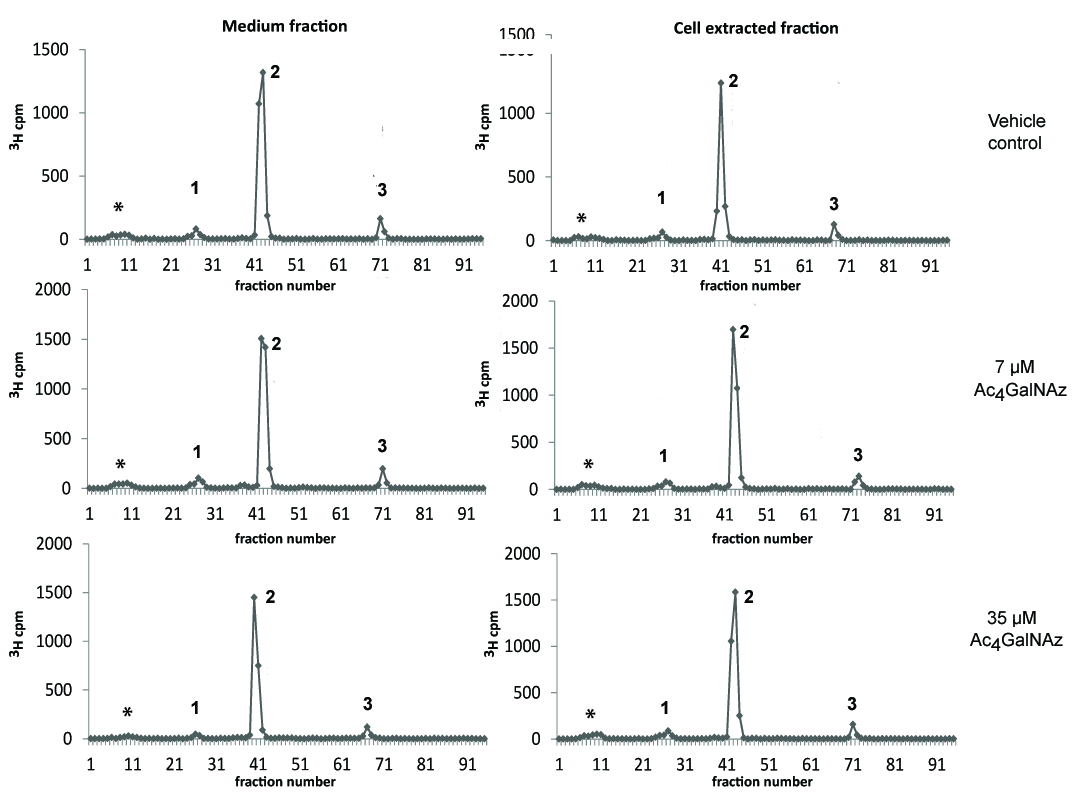


**Supplementary Figure 2. Representative profiles of SAX-HPLC CS/DS disaccharide analysis.** CS/DS chains were digested with chondroitinase ABC and the disaccharides separated via Superdex-30 chromatography. Samples of 5000 cpm digested 3H-disaccharides were run in triplicate. 1, HexA-GalNaC; 2, HexA-GalNAc(4S);, 3, HexA(2S)-GalNAc(4S). *Peaks not correlated with disaccharide standards.

**Supplementary Table 1. CS/DS estimated chain length.** The 50% height mid-width of the histograms from CL6B size exclusion chromatography were used to calculate the range of Kav values.

| Condition | Kav value | Modal size (kDa) |
| --- | --- | --- |
| Vehicle control medium fraction | 0.4 | 32 |
| 7 µM Ac4GalNAz medium fraction | 0.49 | 22 |
| 35 µM Ac4GalNAz medium fraction | 0.4 | 32 |
|  |  |  |
| Vehicle control cell extracted fraction | 0.38 | 38 |
| 7 µM Ac4GalNAz cell extracted fraction | 0.42 | 31 |
| 35 µM Ac4GalNAz cell extracted fraction | 0.4 | 32 |


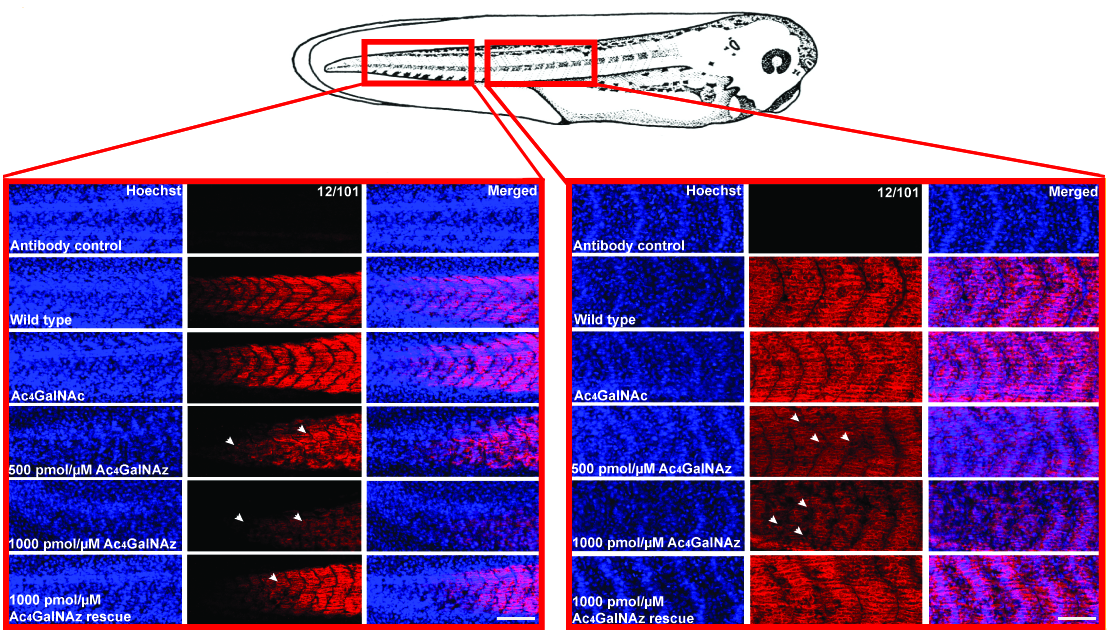


**Supplementary Figure 3. Wholemount fluorescence of skeletal muscle in stage 39 NF *Xenopus tropicalis* tadpoles after the injection of sugars**. Fertilized eggs (stage 1) were injected with 0-1000 pmol Ac4GalNAc or Ac4GalNAz and soaked in 0-1000 uM sugar until developmental stage 39, with daily replacement of the sugar soaking solution. For rescue conditions, Ac4GalNAz was removed for the final 24 hours. Tadpoles were fixed and blocked and stained with 12/101, followed by AlexFluor-594 to visualize skeletal muscle fibres. Embryos were analysed whole using Z stacking and are presented as flattened 3D images from two independent experiments. White arrows indicate defects in musculature. Blue, Hoechst; red, 12/101. Scale bar, 50 µm.
